# Supplementary material for: Alternative Lengthening of Telomeres in Pediatric High-Grade Glioma and Therapeutic Implications
Source: MDPI journal article supplement (doi:10.3390/cancers15123070), 2023-06-06

Umrau, supplementary Figure S1

A.

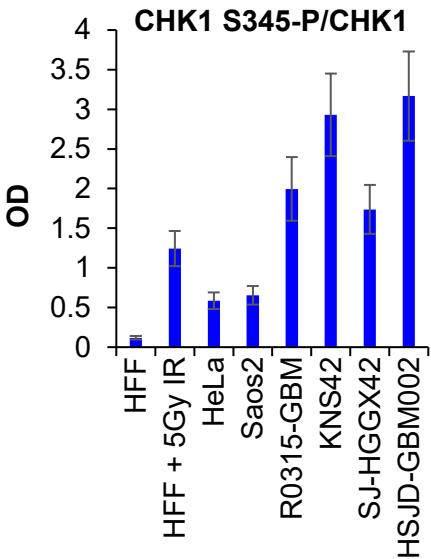

B.

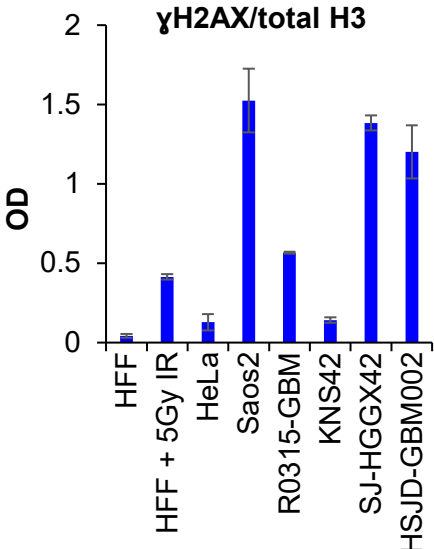

C.

| Cell lines  | IC <sub>50</sub> (μM) |       |
|-------------|-----------------------|-------|
|             | ATRi                  | CHK1i |
| HFF         | 4.17                  | 2.08  |
| HeLa        | 0.48                  | 0.24  |
| Saos2       | 1.00                  | 0.50  |
| R0315-GBM   | 1.25                  | 0.62  |
| KNS42       | 1.00                  | 0.50  |
| SJ-HGGX42   | 0.22                  | 0.11  |
| HSJD-GBM002 | 2.09                  | 1.05  |

D.

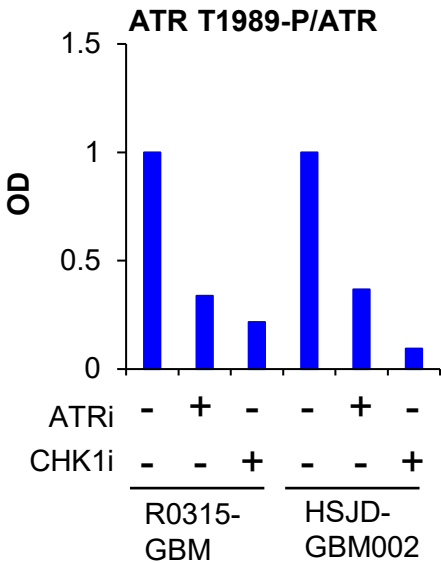

E.

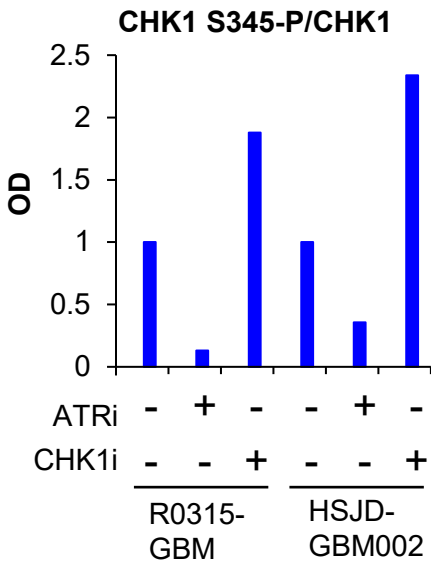

F.

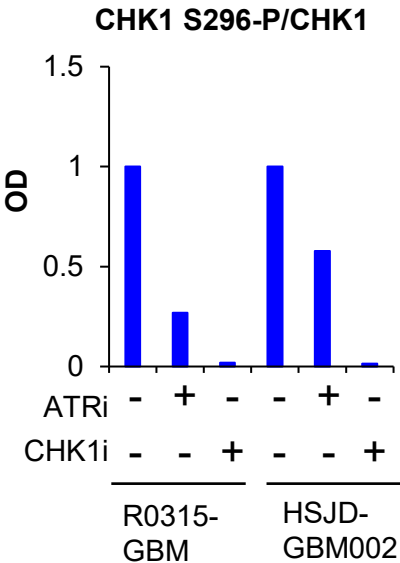

# Umrau, supplementary Figure S2

HSJD-GBM002

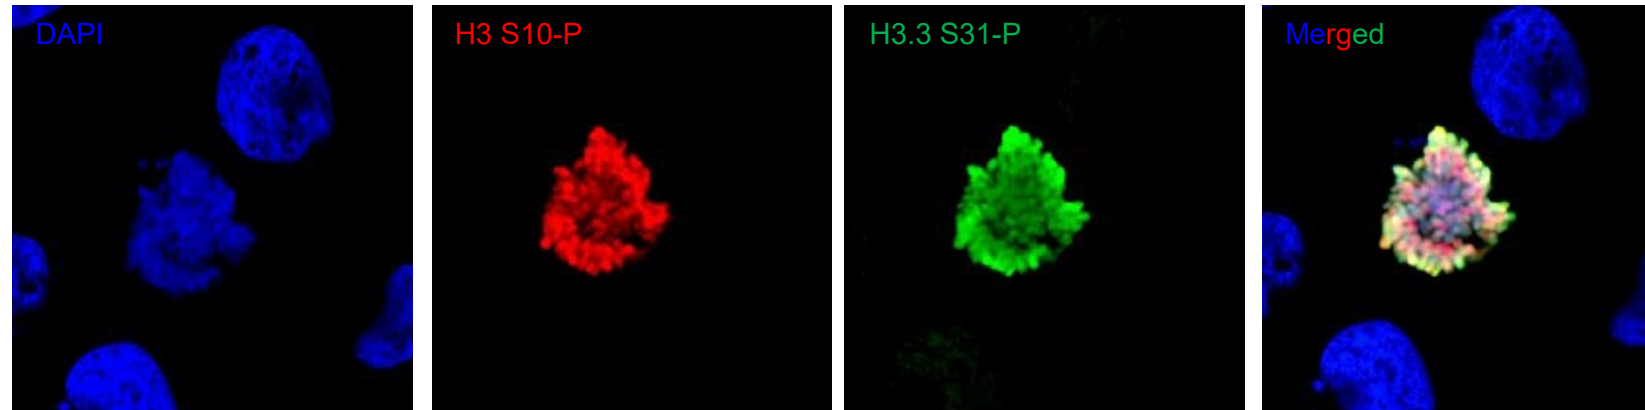

R0315-GBM

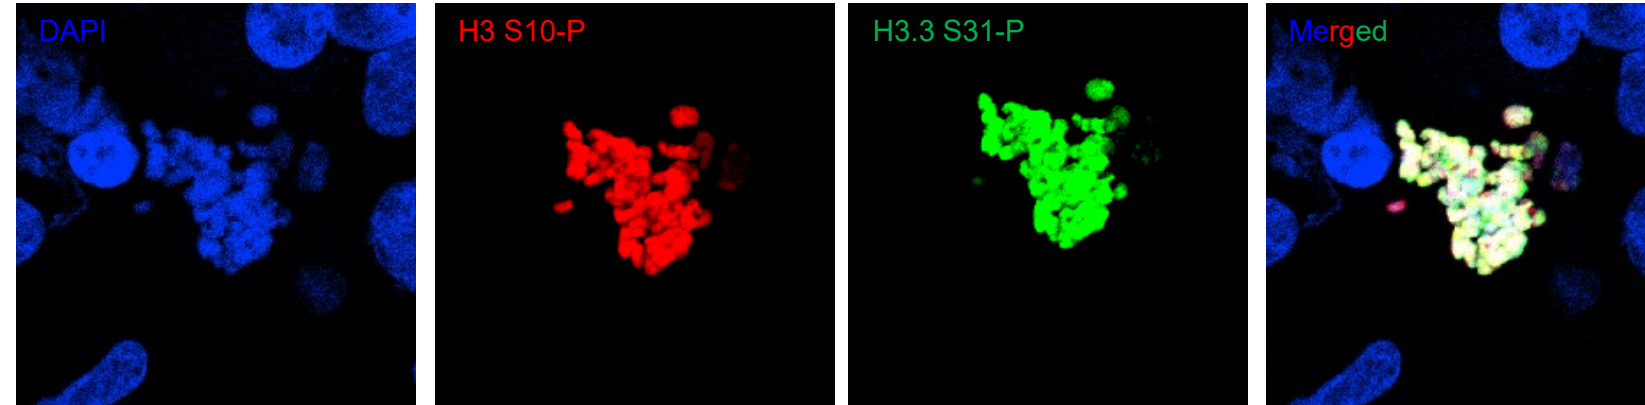

Umaru, supplementary Figure S3A

A.

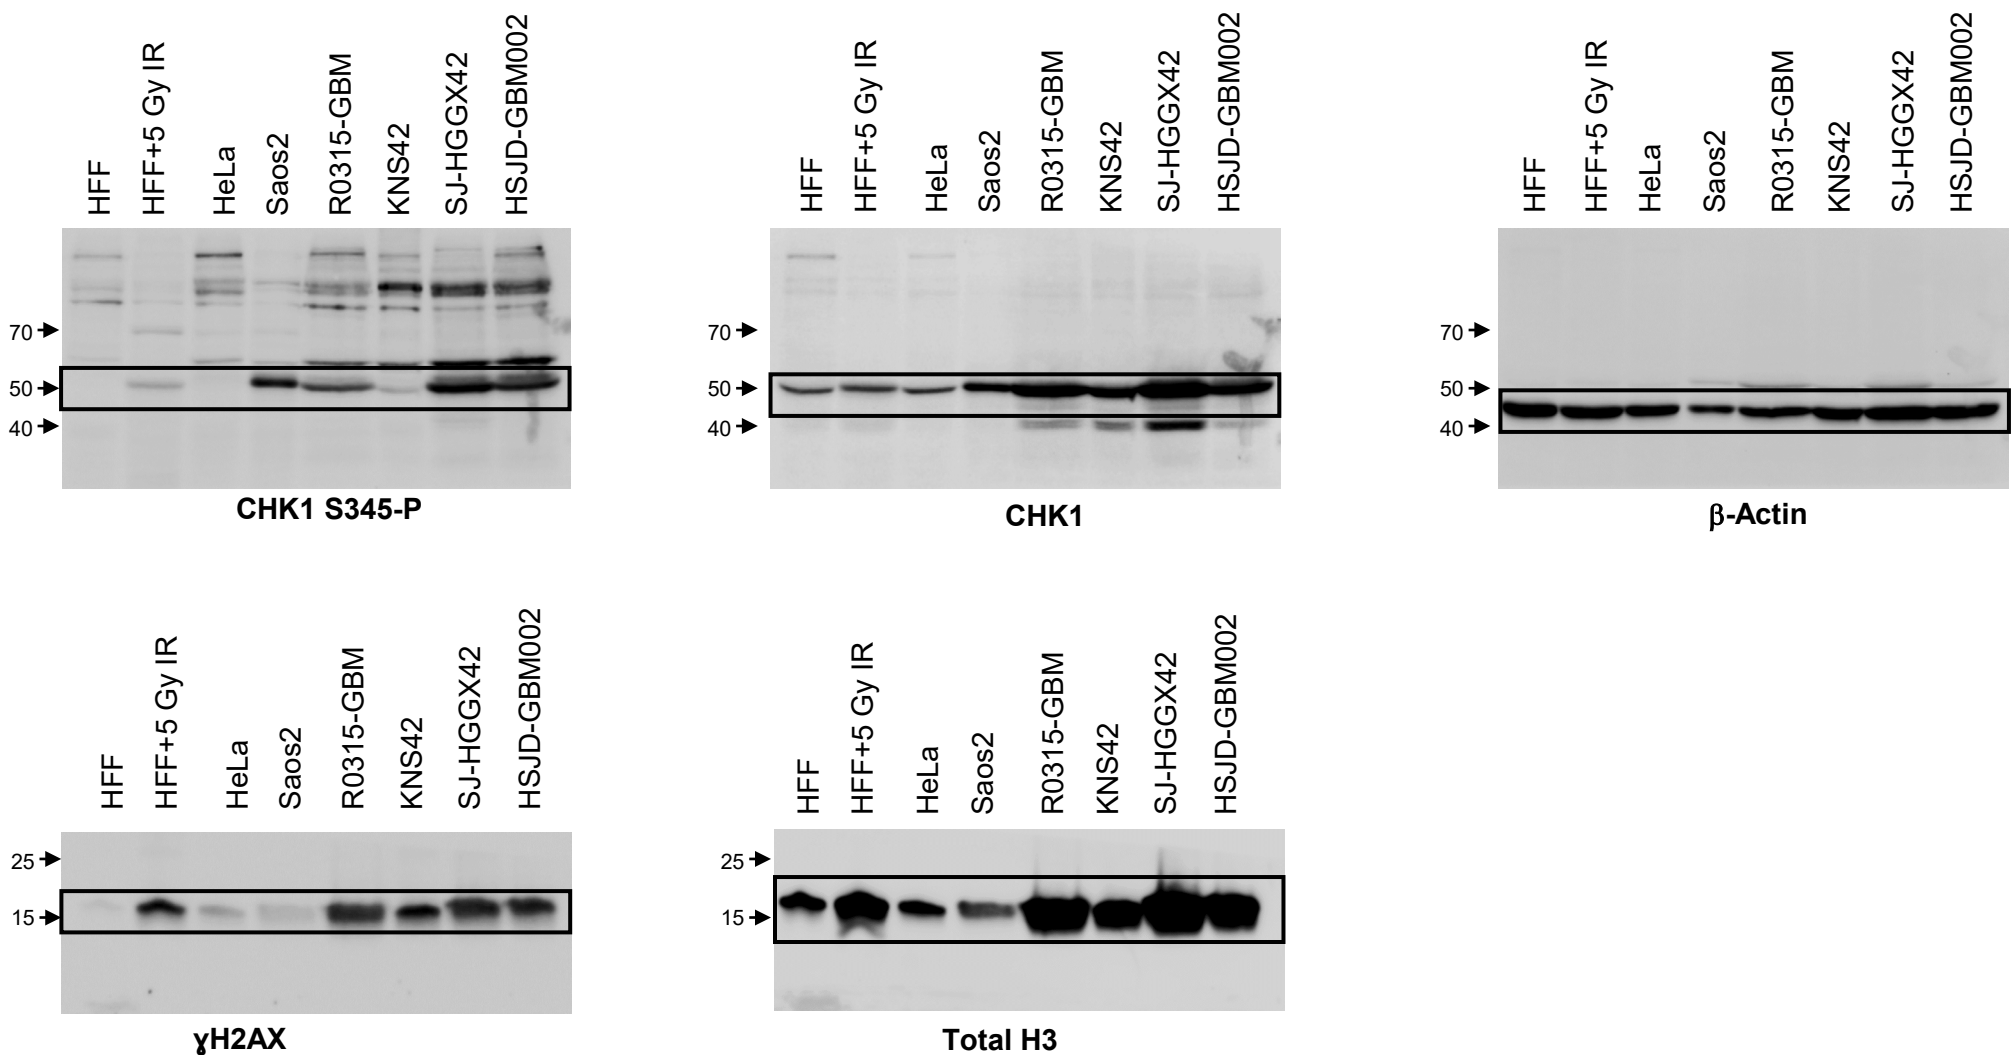

B.

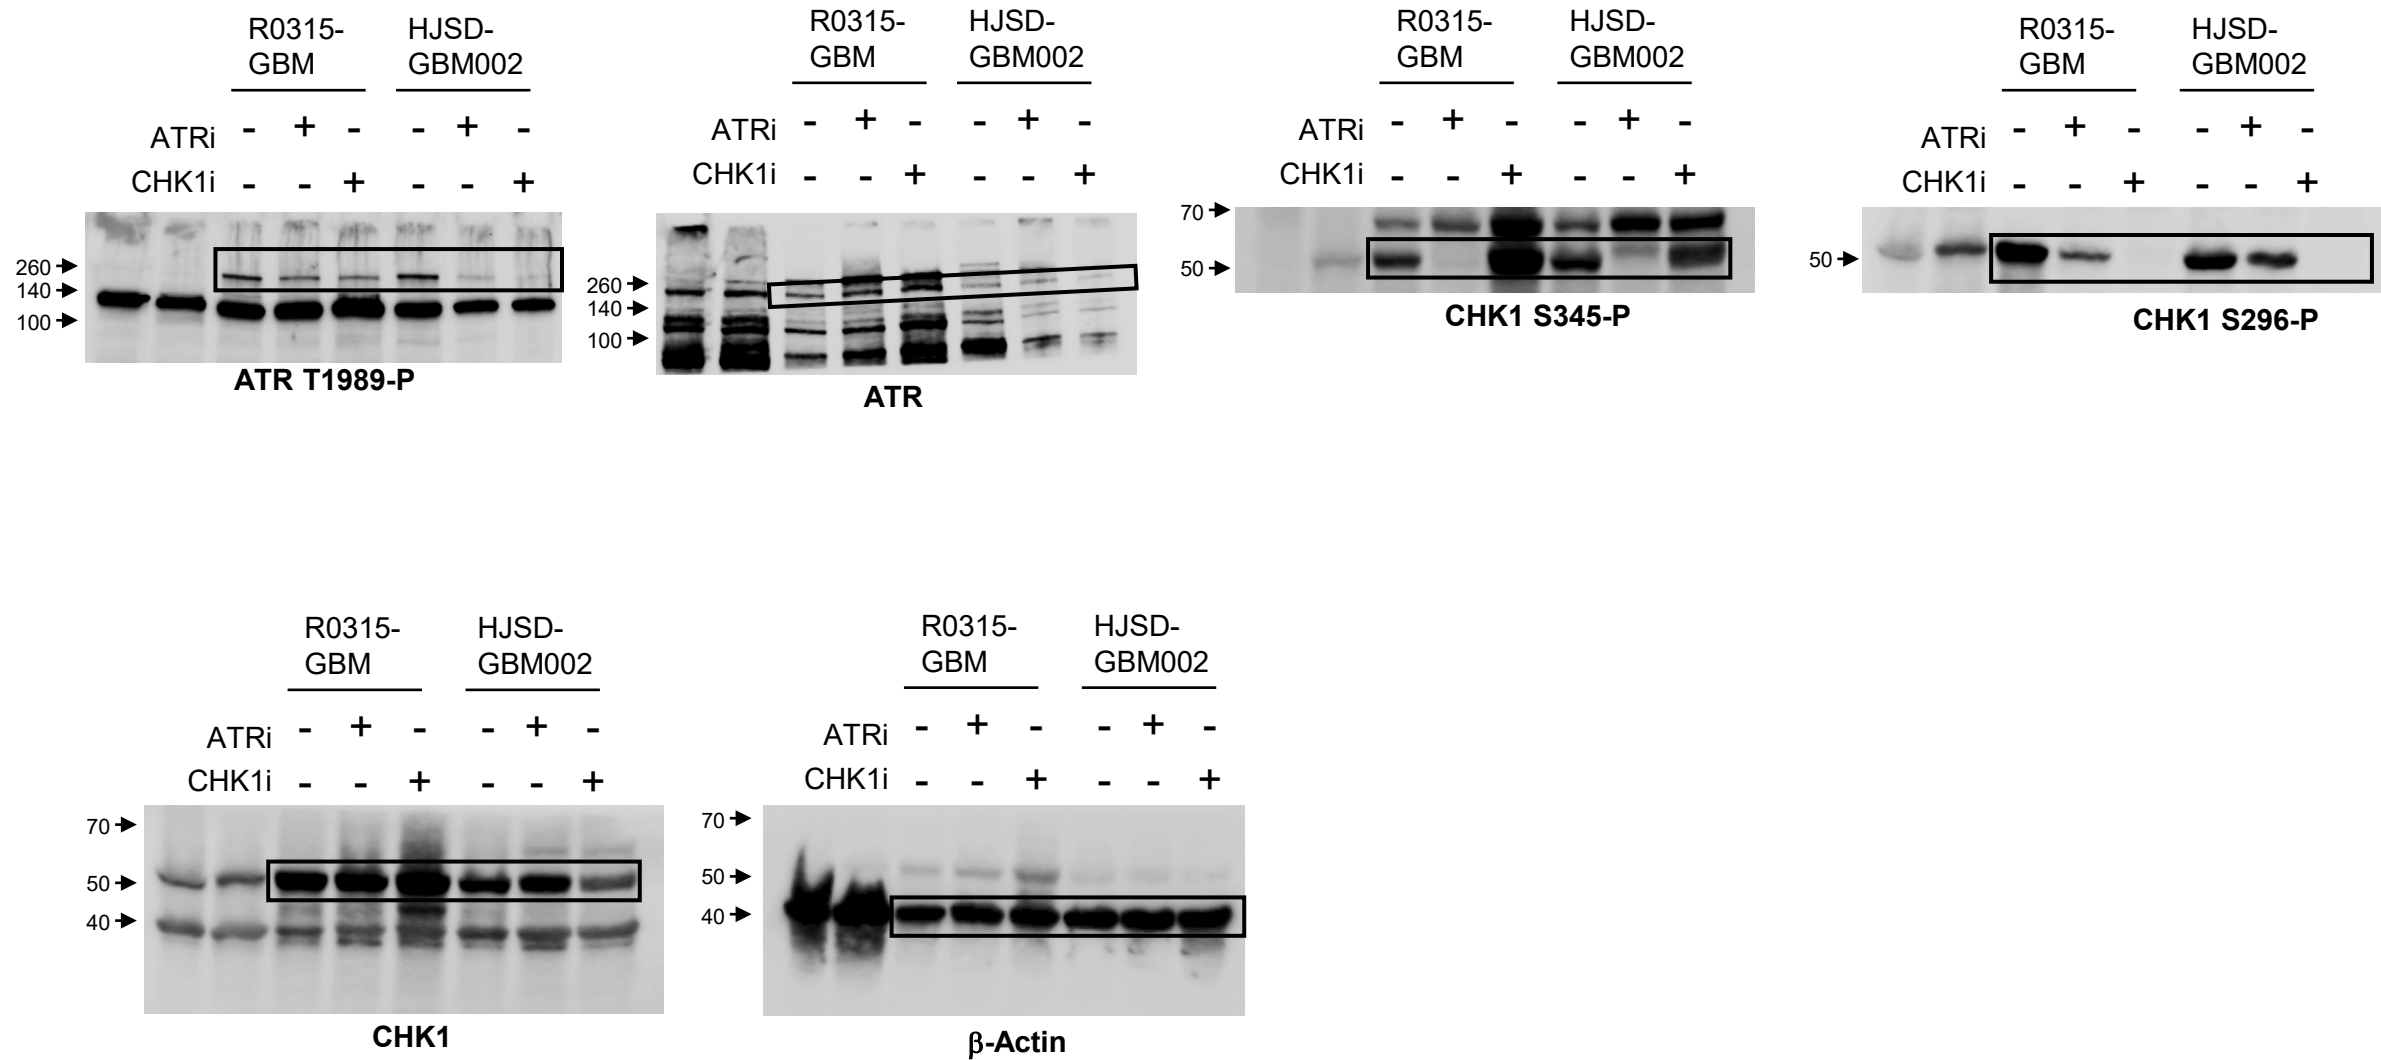

Supplement: s1 [file s1]
